# Supplementary material for: Fluorescent organotin compounds as dyes in silk fibroin (Bombyx mori): ultrasound-assisted synthesis, chemo-optical characterization, cytotoxicity, and confocal fluorescence microscopy
Source: Royal Society of Chemistry journal article supplement (doi:10.1039/c8nj05248d), 2019-01-01
Supplement: c8nj05248d1.pdf [file c8nj05248d1.pdf]

## Supplementary information for:

### Fluorescent organotin compounds as dyes in silk fibroin (*Bombyx mori*): Ultrasound and Conventional Synthesis, Chemo-Optical Characterization, Cytotoxicity, and Confocal Fluorescence Microscopy

Jessica C. Berrones-Reyes, Blanca M. Muñoz-Flores, Abigail Molina-Paredes, Marisol Ibarra Rodríguez, Alejandro Rodríguez-Ortega, H. V. Rasika Dias, Víctor M. Jiménez-Pérez.\*

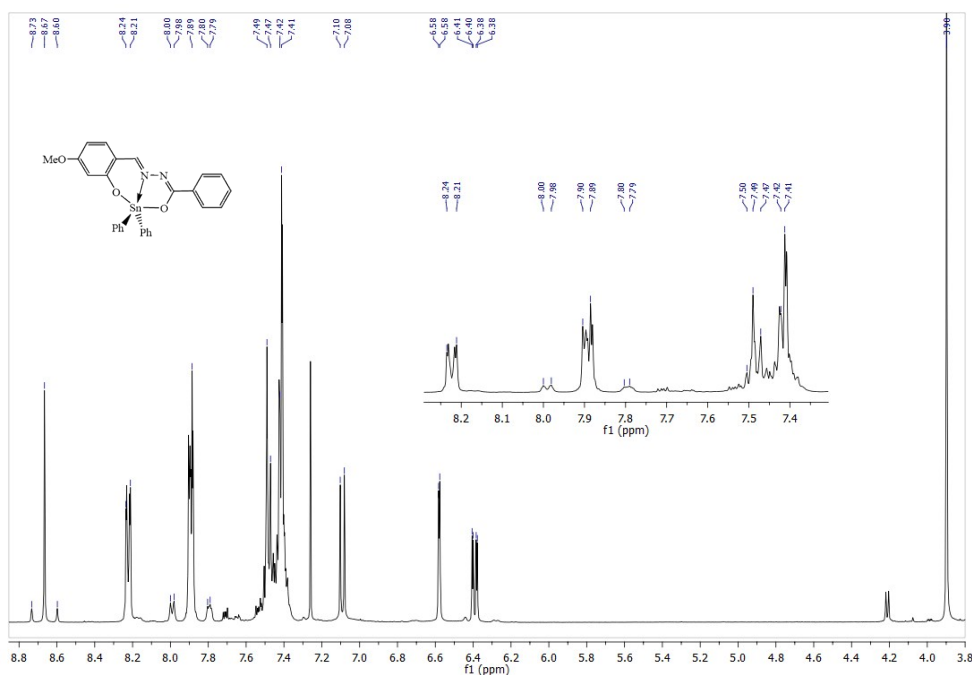

**Fig. S1.** The <sup>1</sup>H -NMR (400 MHz, CDCl<sub>3</sub>) spectrum of compound 1.

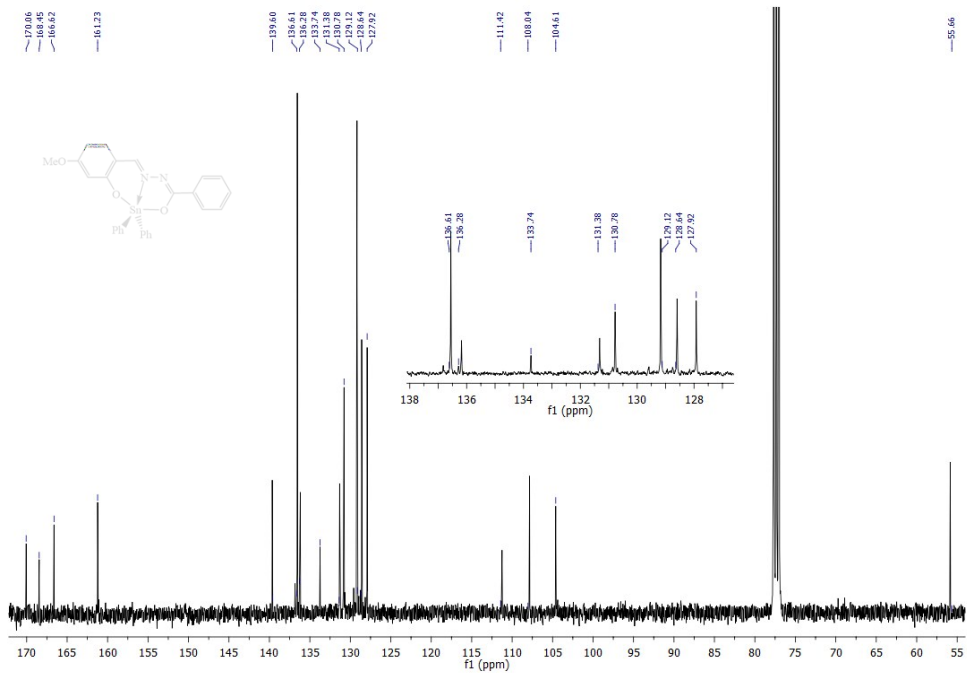

**Fig. S2.** The <sup>13</sup>C-NMR (100 MHz, CDCl<sub>3</sub>) spectrum of compound **1**.

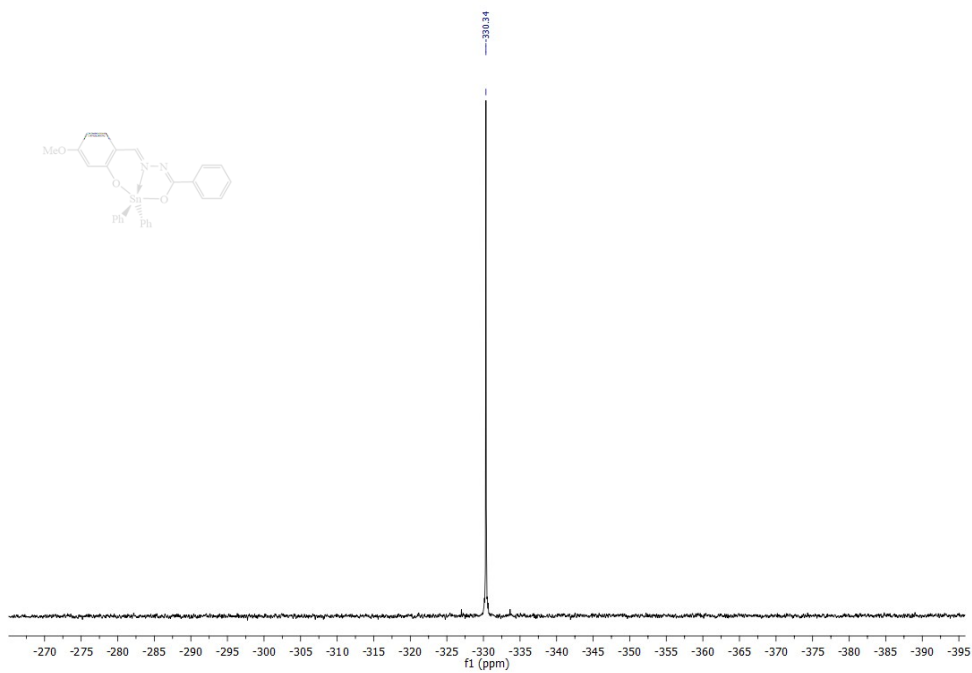

**Fig. S3.** The <sup>119</sup>Sn-NMR (149.14 MHz, CDCl<sub>3</sub>) spectrum of compound **1**.

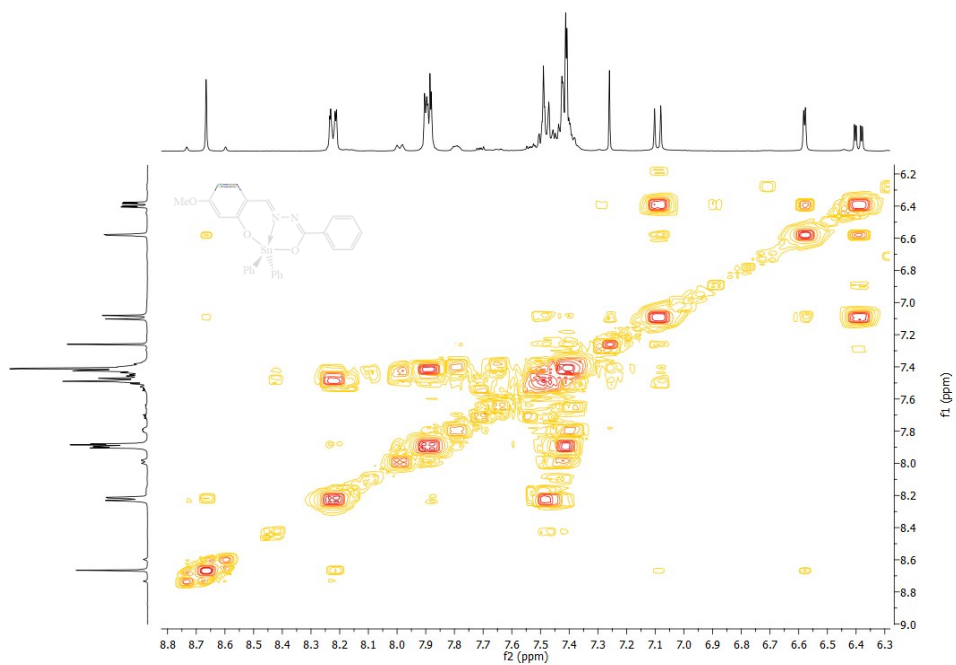

**Fig. S4.** The  $^1\text{H}/^1\text{H}$  COSY spectrum of compound **1**.

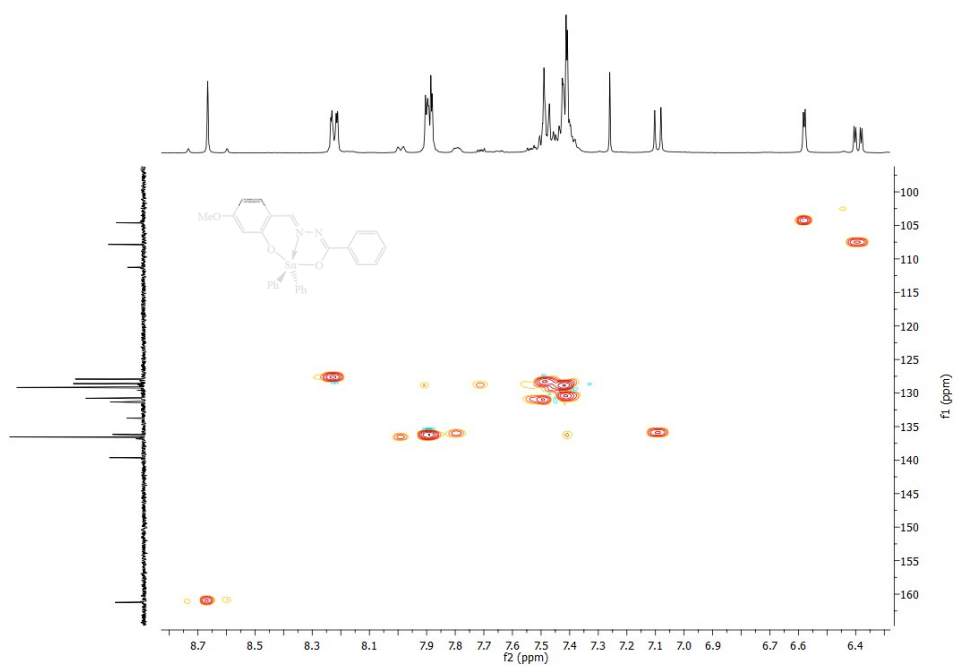

**Fig. S5.** The  $^1\text{H}/^{13}\text{C}$  HETCOR spectrum of compound **1**.



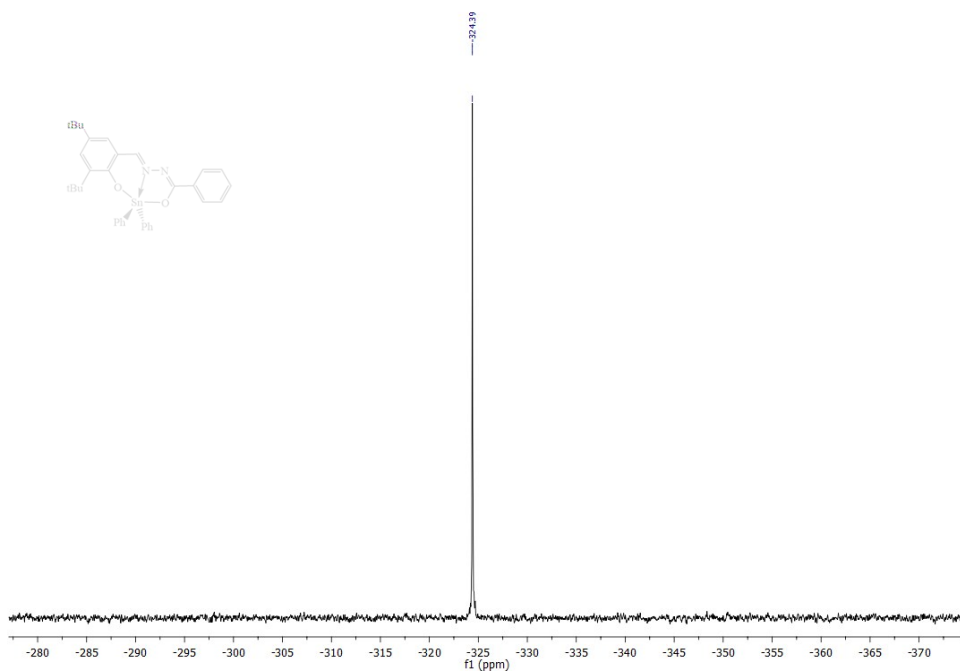

**Fig. S8.** The  $^{119}\text{Sn}$ -NMR (149.14 MHz,  $\text{CDCl}_3$ ) spectrum of compound 2.

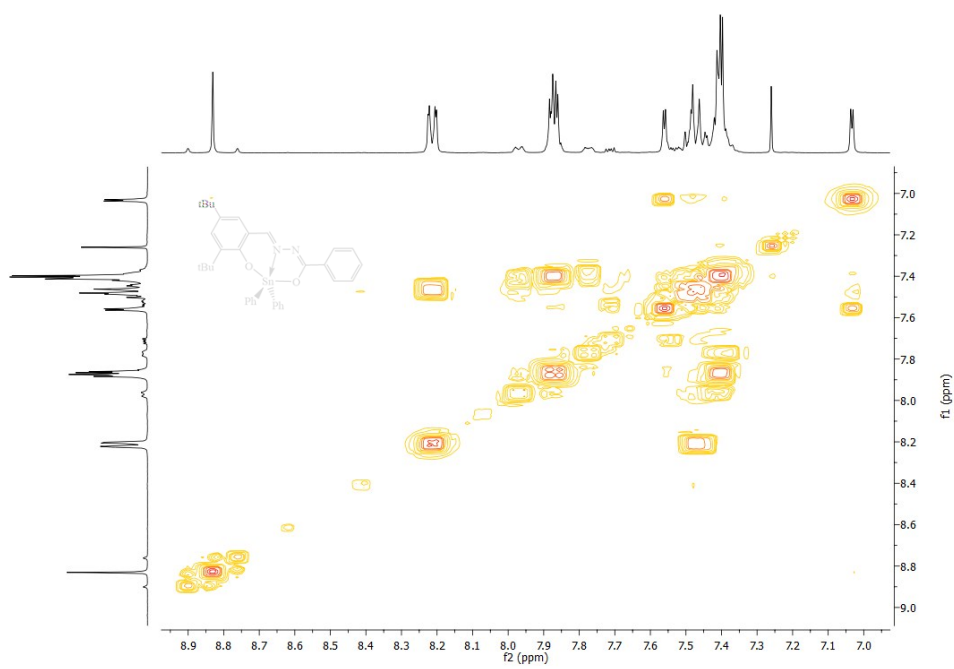

**Fig. S9.** The  $^1\text{H}/^1\text{H}$  COSY spectrum of compound 2.

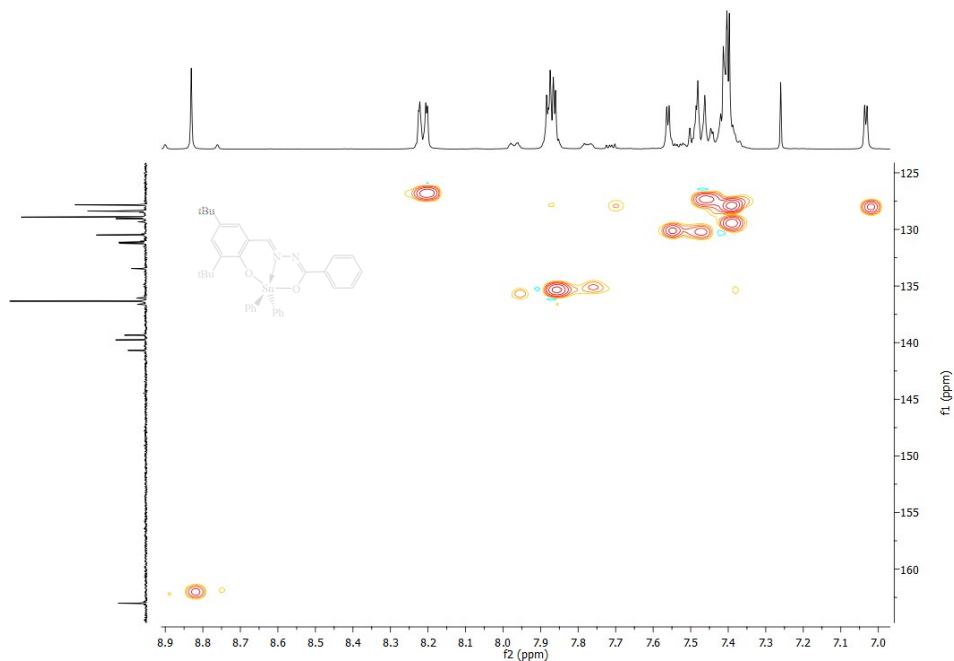

**Fig. S10.** The  $^1\text{H}/^{13}\text{C}$  HETCOR spectrum of compound **2**.

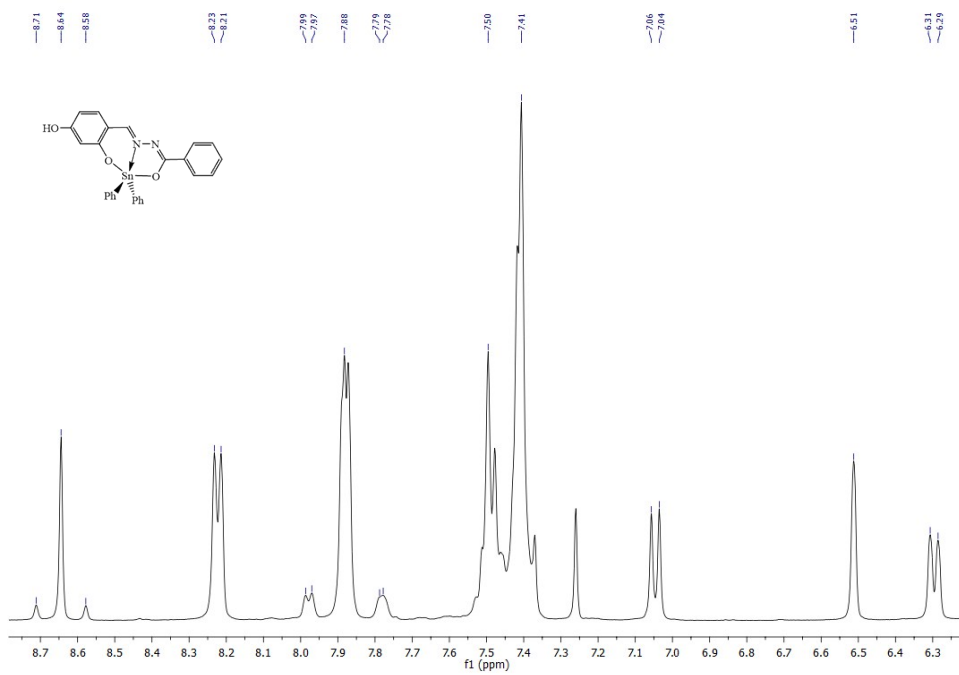

**Fig. S11.** The  $^1\text{H}$ -NMR (400 MHz,  $\text{CDCl}_3$ ) spectrum of compound **3**.

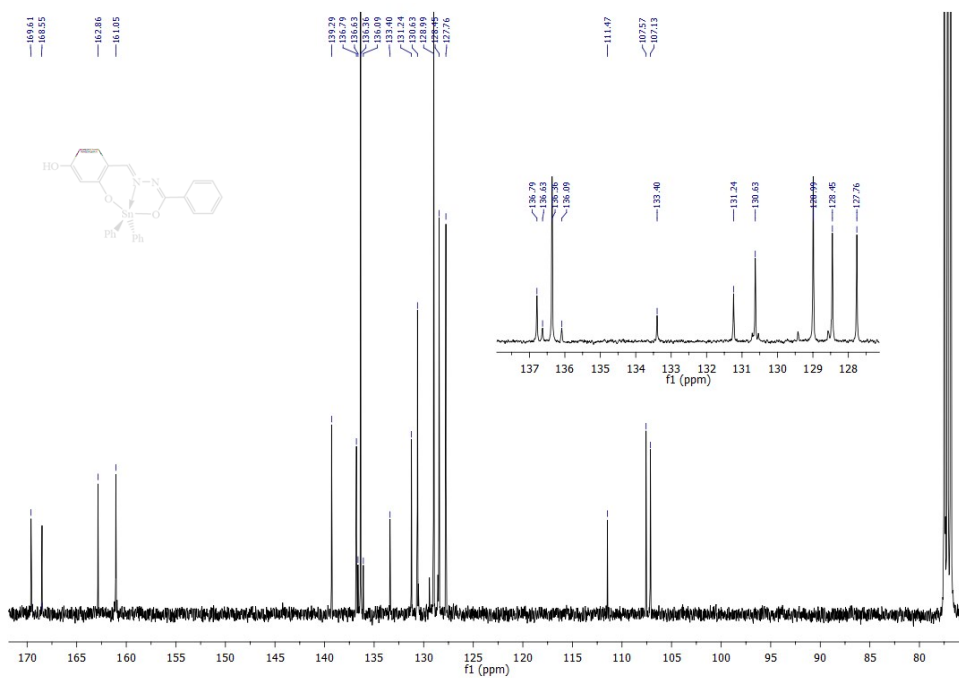

**Fig. S12.** The <sup>13</sup>C-NMR (100 MHz, CDCl<sub>3</sub>) spectrum of compound **3**.

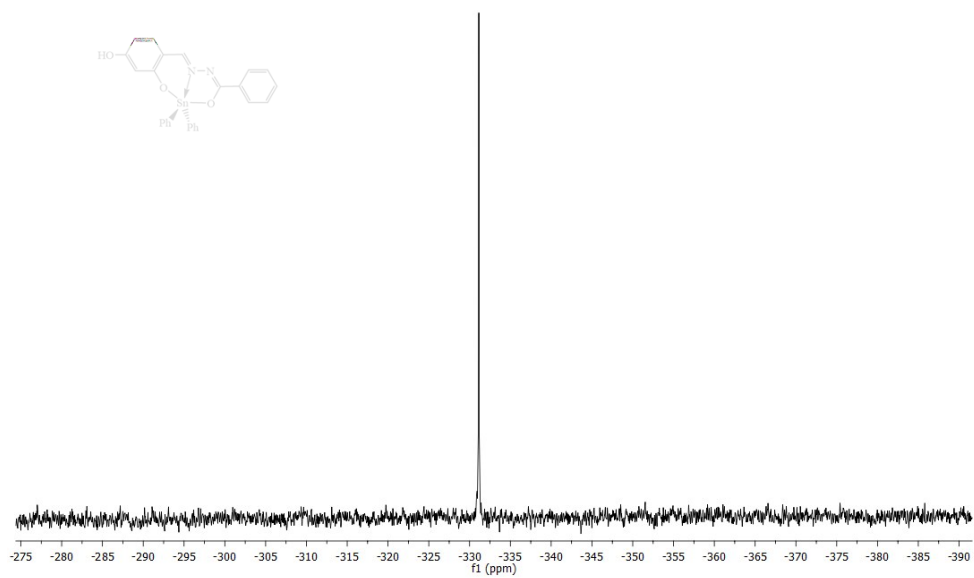

**Fig. S13.** The <sup>119</sup>Sn-NMR (149.14 MHz, CDCl<sub>3</sub>) spectrum of compound **3**.

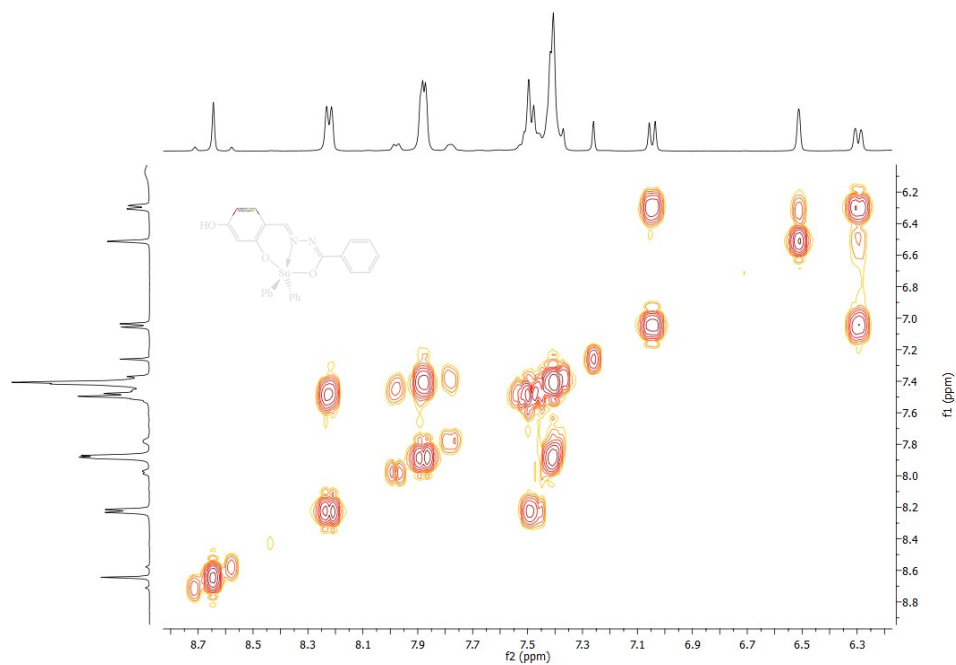

**Fig. S14.** The  $^1\text{H}/^1\text{H}$  COSY spectrum of compound **3**.

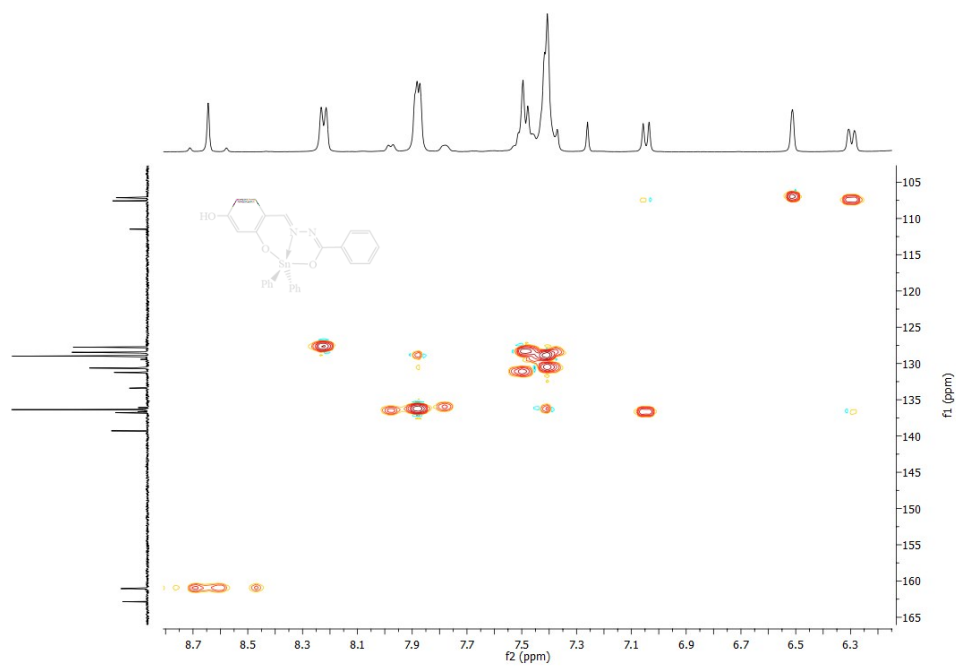

**Fig. S15.** The  $^1\text{H}/^{13}\text{C}$  HETCOR spectrum of compound **3**.



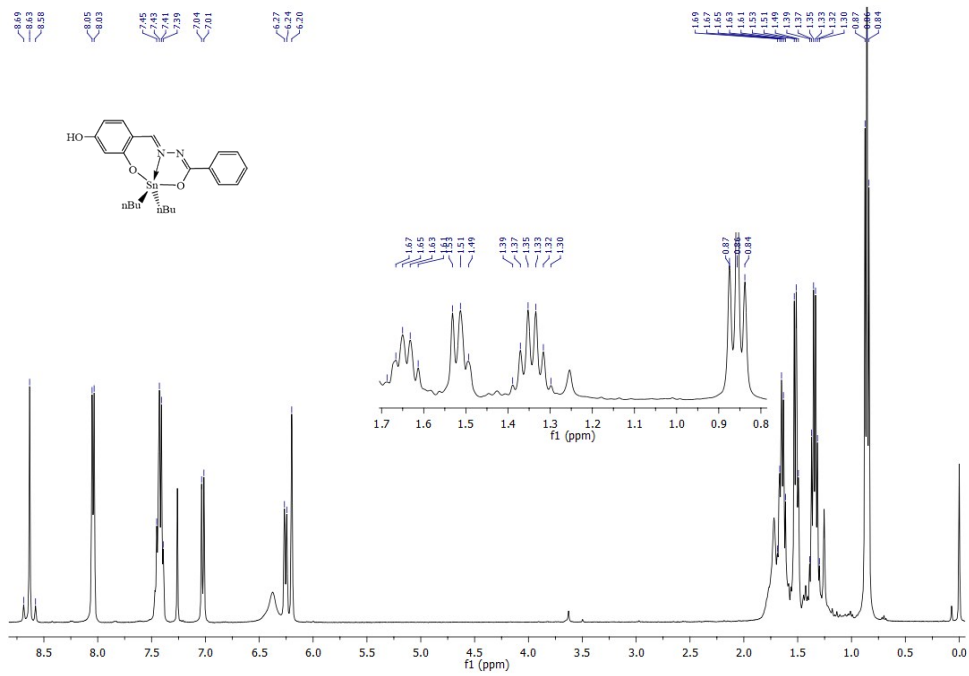

Fig. S16. The <sup>1</sup>H-NMR (400 MHz, CDCl<sub>3</sub>) spectrum of compound 4.

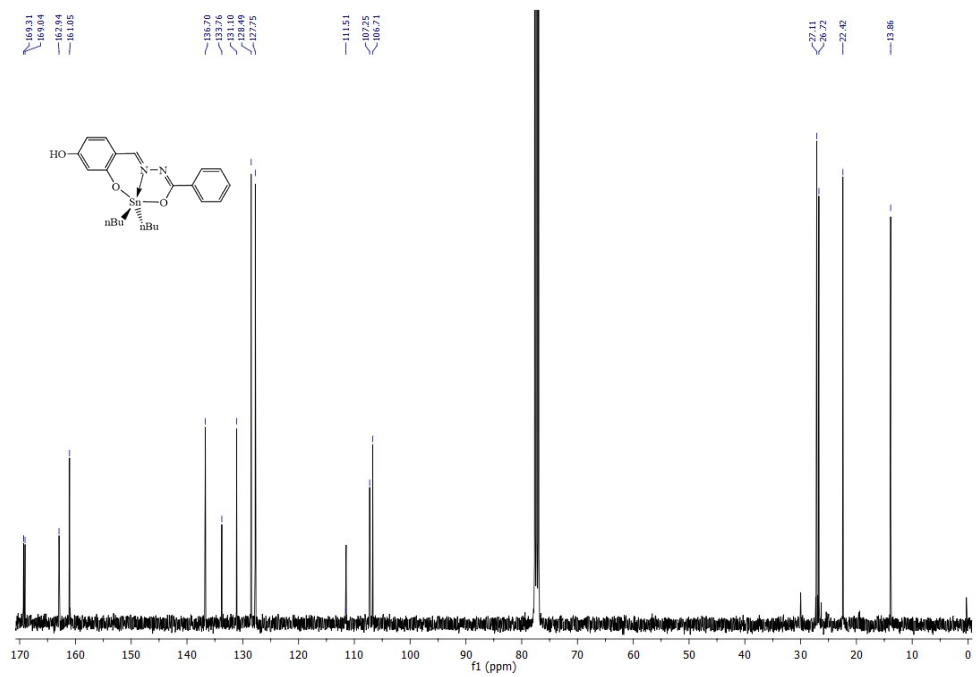

Fig. S17. The <sup>13</sup>C-NMR (100 MHz, CDCl<sub>3</sub>) spectrum of compound 4.

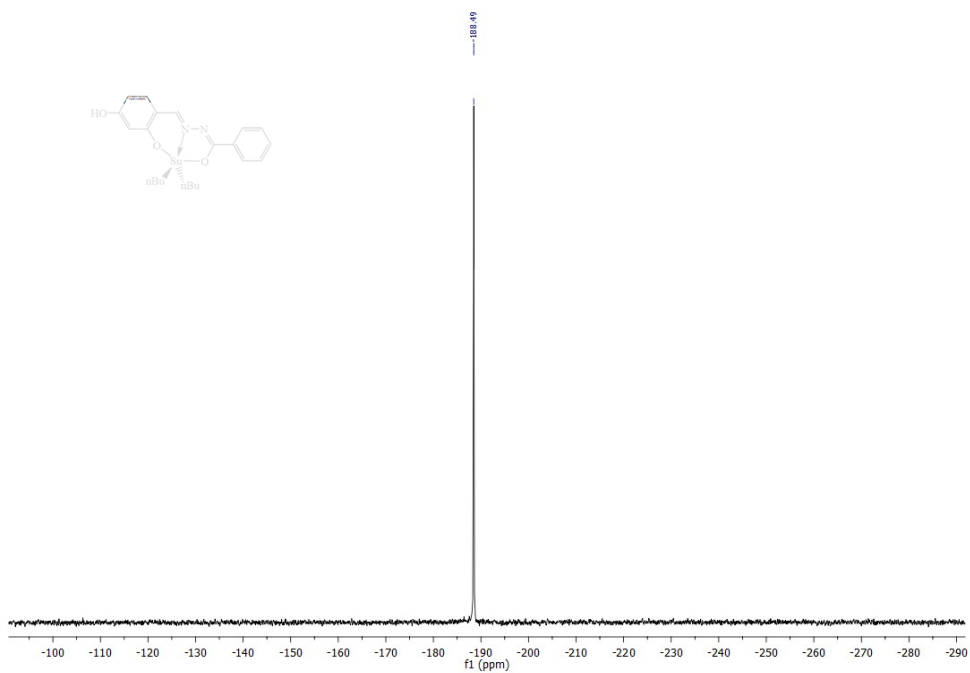

**Fig. S18.** The  $^{119}\text{Sn}$ -NMR (149.14 MHz,  $\text{CDCl}_3$ ) spectrum of compound 4.

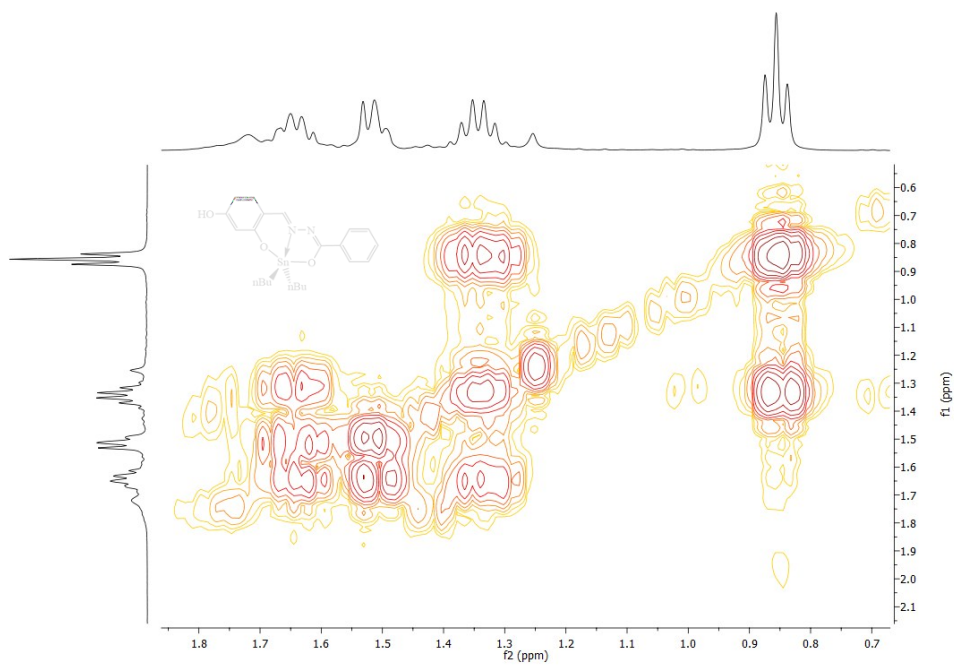

**Fig. S19.** The  $^1\text{H}/^1\text{H}$  COSY spectrum of compound 4 (aliphatic region).

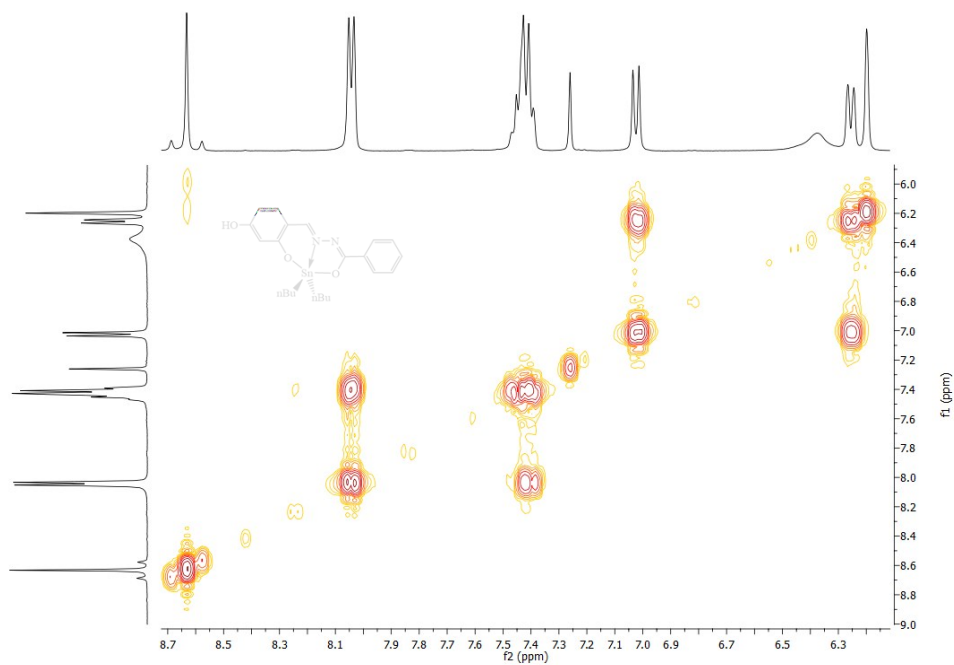

**Fig. S20.** The  $^1\text{H}/^1\text{H}$  COSY spectrum of compound **4** (aromatic region).

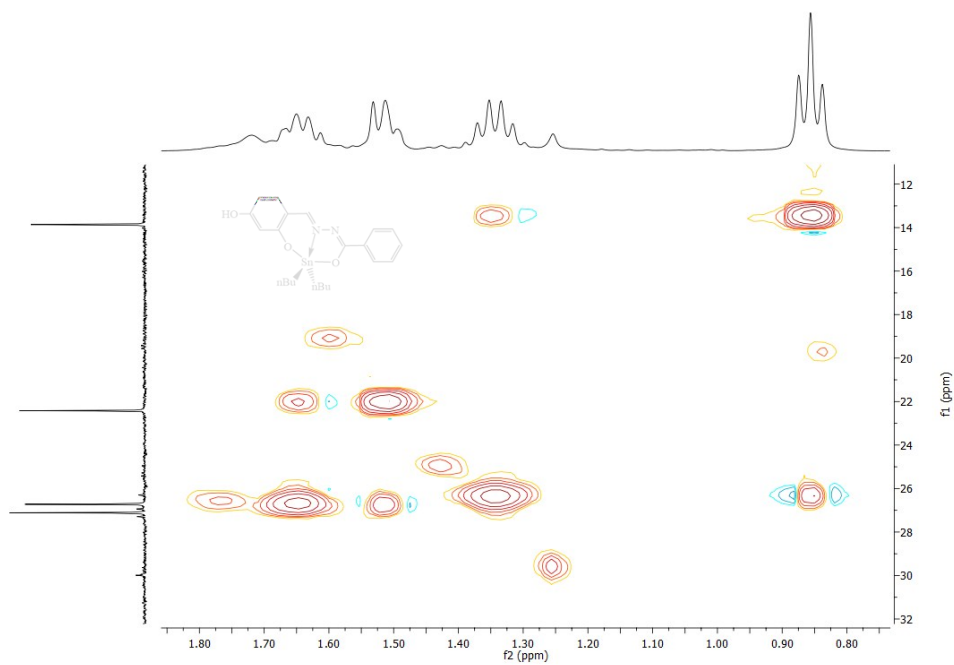

**Fig. S21.** The  $^1\text{H}/^{13}\text{C}$  HETCOR spectrum of compound **4** (aliphatic region).

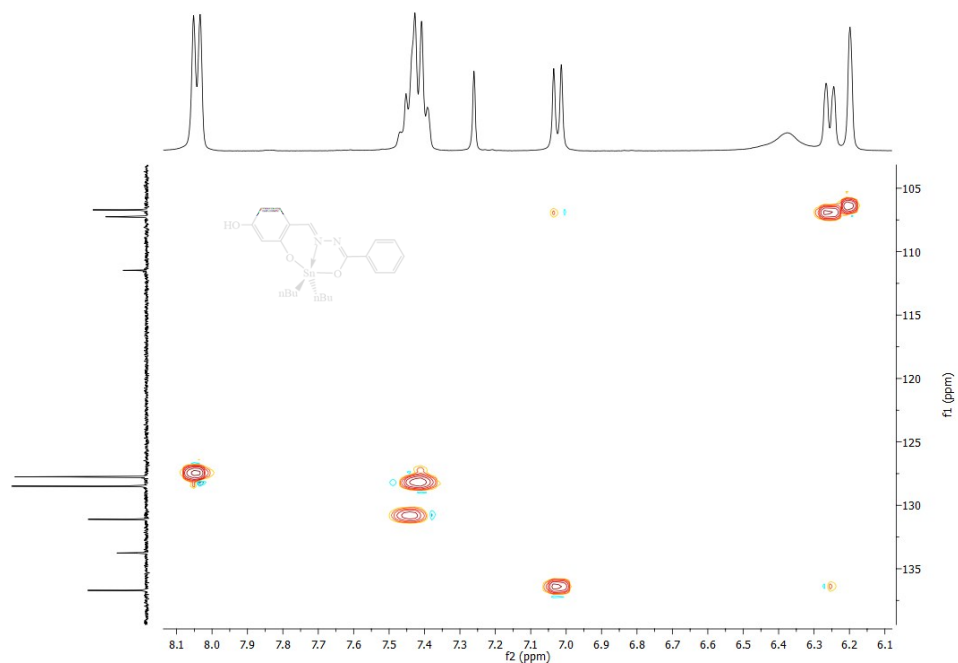

**Fig. S22.** The  $^1\text{H}/^{13}\text{C}$  HETCOR spectrum of compound 4 (aromatic region).

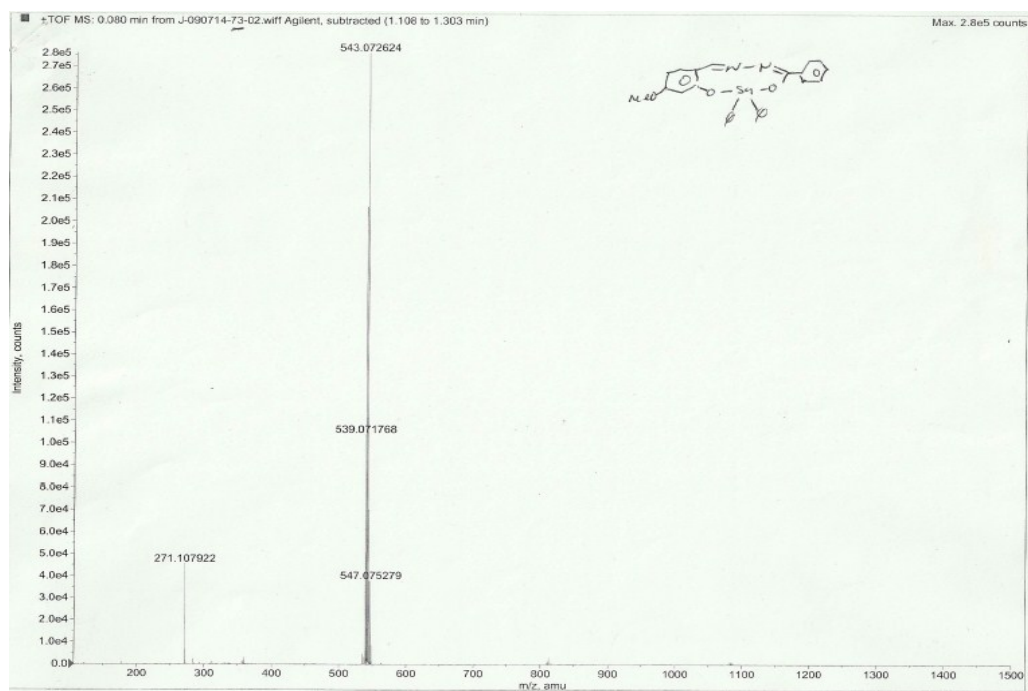

**Fig. S23.** The Mass spectrum of compound 1.

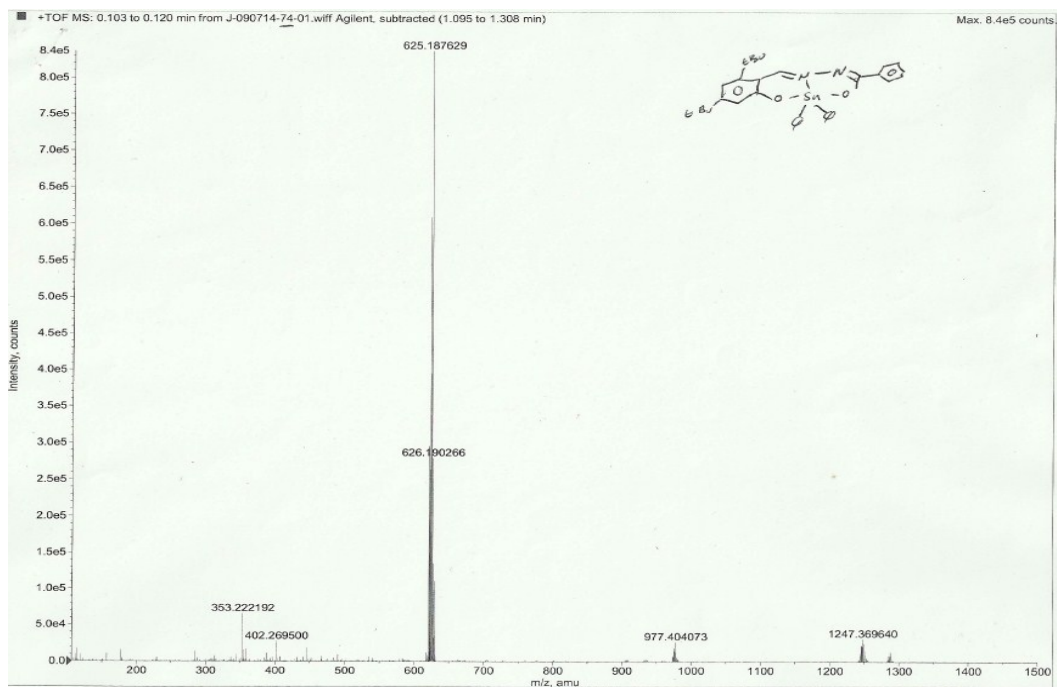

**Fig. S24.** The Mass spectrum of compound 2.

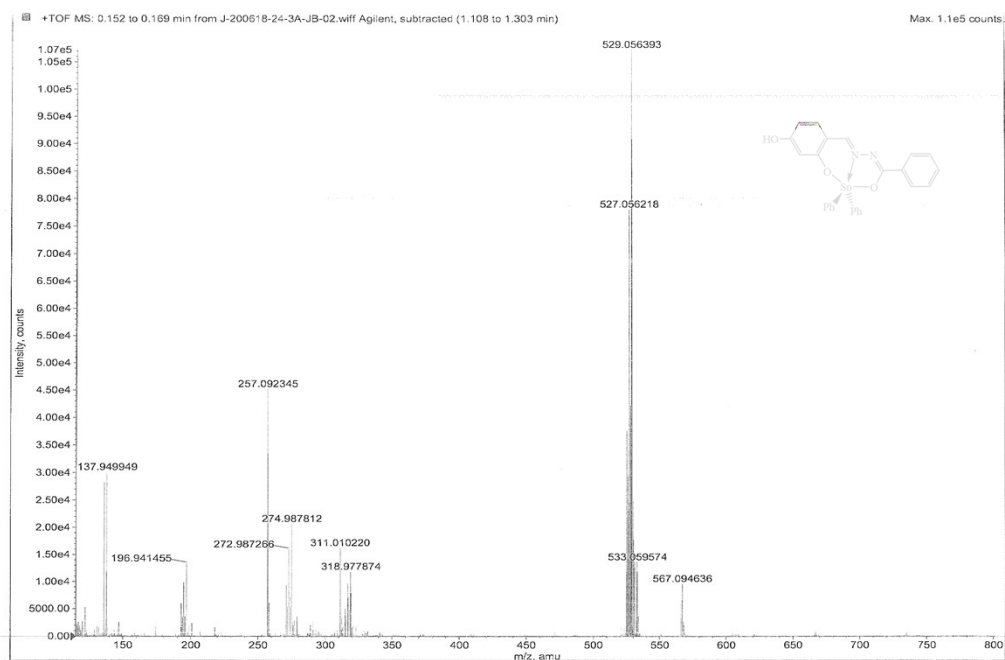

**Fig. S25.** The Mass spectrum of compound 3.

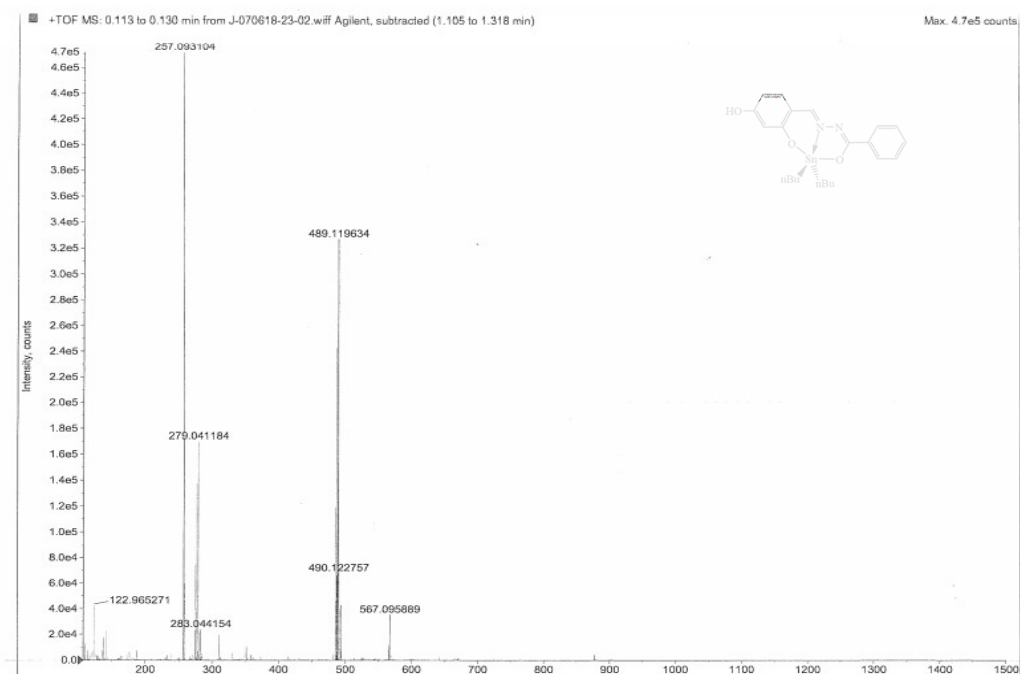

**Fig. S26.** The Mass spectrum of compound 4.
